# Supplementary figures and images for: Neonatal Pneumothoraces With Atypical Location: The Role of Lung Ultrasound
Source: Research Square preprint supplement (doi:10.21203/rs.3.rs-949219/v1), 2021-10-19

|  | **X-rays** | **Lung ultrasound** | | |
| --- | --- | --- | --- | --- |
| **A.30 min after surgery** | 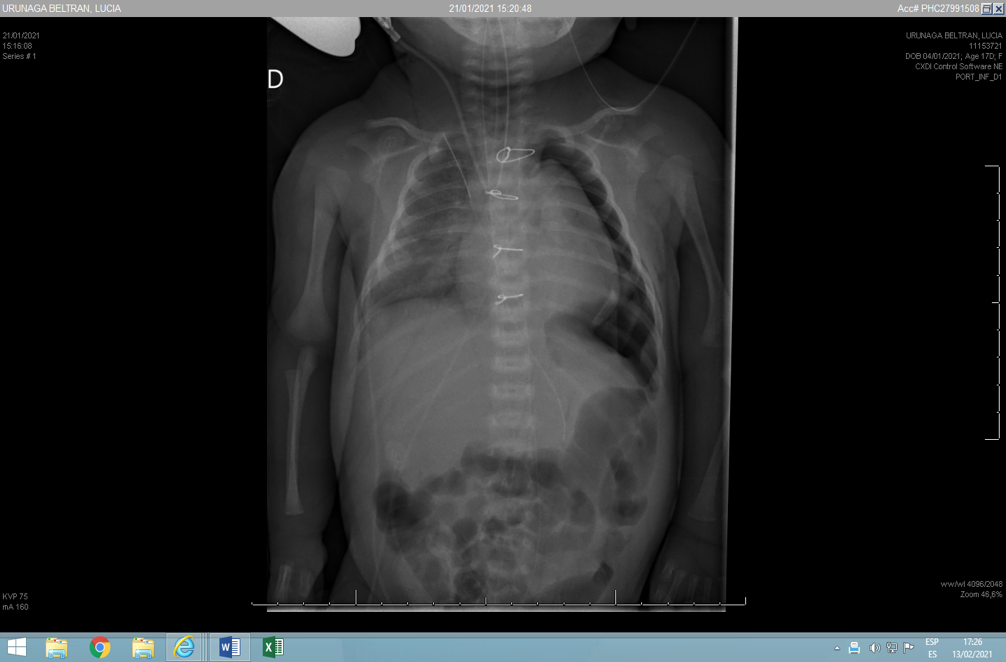 | **Anterior** | **Lateral** | **Posterior** |
| 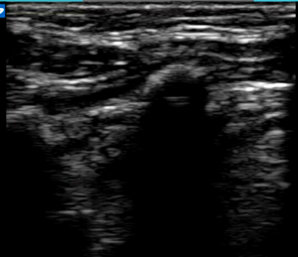 | 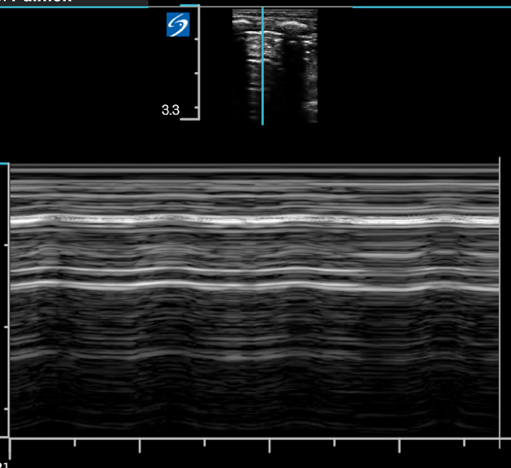 | **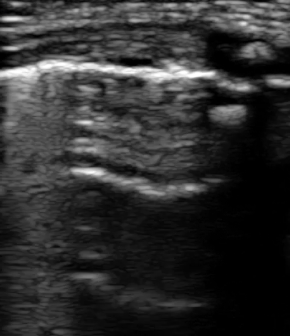** |
| **B.2 h after surgery** | 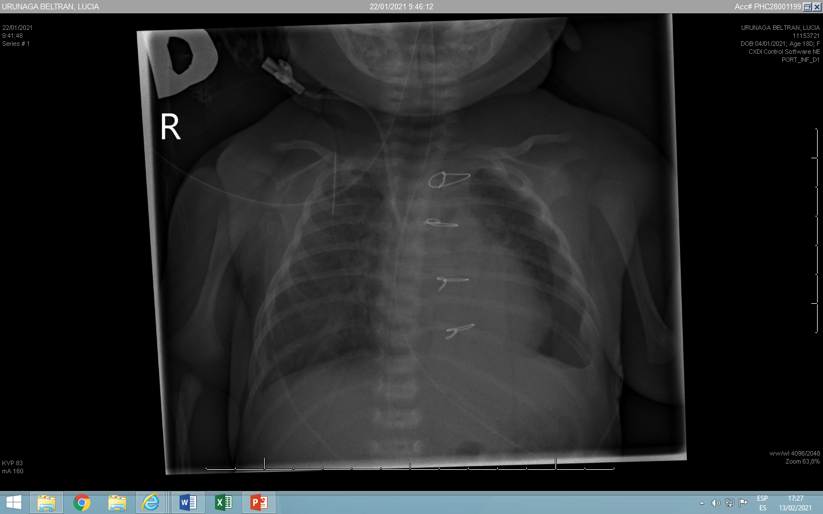 | 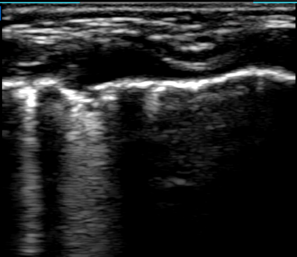 | 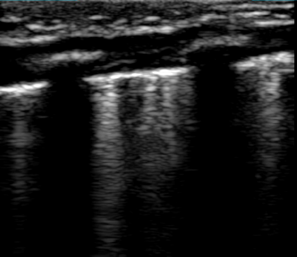 | 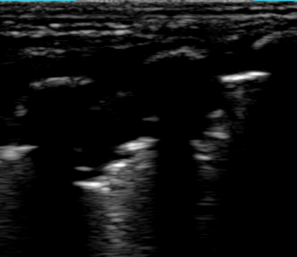 |

**TABLE 1.**

Supplement: Supplementary file 1 [file 00ab9fdba45f0327e6136f05.docx]
